# Supplementary material
Source: Springer Nature journal article supplement (https://www.springermedizin.de/resource/supplementary/12871_2014_323_MOESM3_ESM.pdf/9429114)

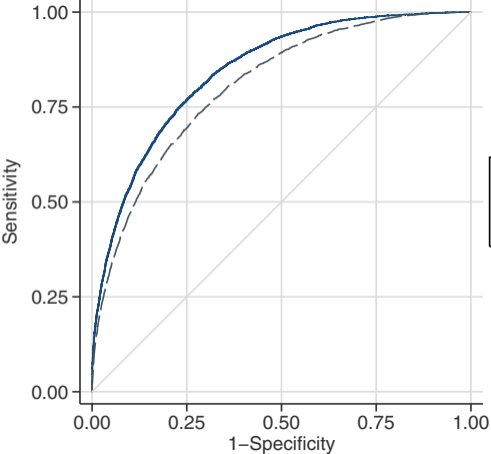

| Model         | c index |
|---------------|---------|
| ICNARC (2009) | 0.848   |
| APACHE II     | 0.806   |

Supplement: MOESM3 [file 9429114]
